# Supplementary material for: Projected increases in magnitude and socioeconomic exposure of global droughts in 1.5 °C and 2 °C warmer climates
Source: Copernicus journal article supplement (doi:10.5194/hess-2019-480), 2019-10-14
Supplement: Supplementary file 2 [file hess-2019-480-supplement.pdf]

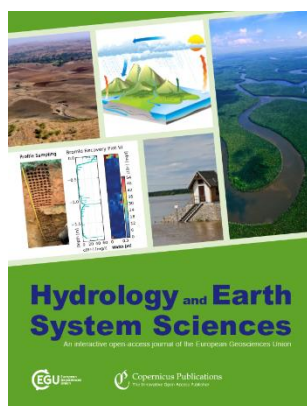

<https://www.hydrology-and-earth-system-sciences.net/>

## Supplementary Information for

### Projected increases in magnitude and socioeconomic exposure of global droughts in 1.5 °C and 2 °C warmer climates

Lei Gu<sup>1</sup>, Jie Chen<sup>1,2\*</sup>, Jiabo Yin<sup>1\*</sup>, Sylvia C. Sullivan<sup>3</sup>, Hui-Min Wang<sup>1</sup>, Shenglian Guo<sup>1</sup>, Liping Zhang<sup>1,2</sup>, Jong-Suk Kim<sup>1,2</sup>

<sup>1</sup>State Key Laboratory of Water Resources and Hydropower Engineering Science, Wuhan University, Wuhan 430072, P. R. China

<sup>2</sup>Hubei Provincial Key Lab of Water System Science for Sponge City Construction, Wuhan University, Wuhan, China

<sup>3</sup>Department of Earth and Environmental Engineering, Columbia University, New York, NY 10027, USA

\* Correspondence to: Jie Chen ([jiechen@whu.edu.cn](mailto:jiechen@whu.edu.cn)); Jiabo Yin ([jboyn@whu.edu.cn](mailto:jboyn@whu.edu.cn))

**This PDF file includes:**

Figures S1 to S10 and Table S1

---

## List of Supplementary Figures

Figure S1 GDP and Population under the 1.5°C and 2.0°C warming target

Figure S2 National population and GDP fraction exposing to more frequent severe droughts in 2.0°C relative to 1.5°C warming target

Figure S3 Drought exposures for 8 typical drought-prone countries under the 1.5°C warming target

Figure S4 Drought exposures for 8 typical drought-prone countries under the 2.0°C warming target

Figure S5 Uncertainty for SPEI-3 changes under the 1.5°C warming target

Figure S6 Uncertainty for SPEI-3 changes between the 1.5°C and 2.0°C warming target

Figure S7 Uncertainty for drought duration and severity changes under the 1.5°C warming target

Figure S8 Uncertainty for drought duration and severity changes between the 1.5°C and 2.0°C warming target

Figure S9 Model uncertainty for changes of 50-year joint return period (JRP) under the 1.5°C warming target

Figure S10 Model uncertainty for changes of 50-year joint return period (JRP) between the 1.5°C and 2.0°C warming target

Table S1 Summary statistic table for changes in major variables

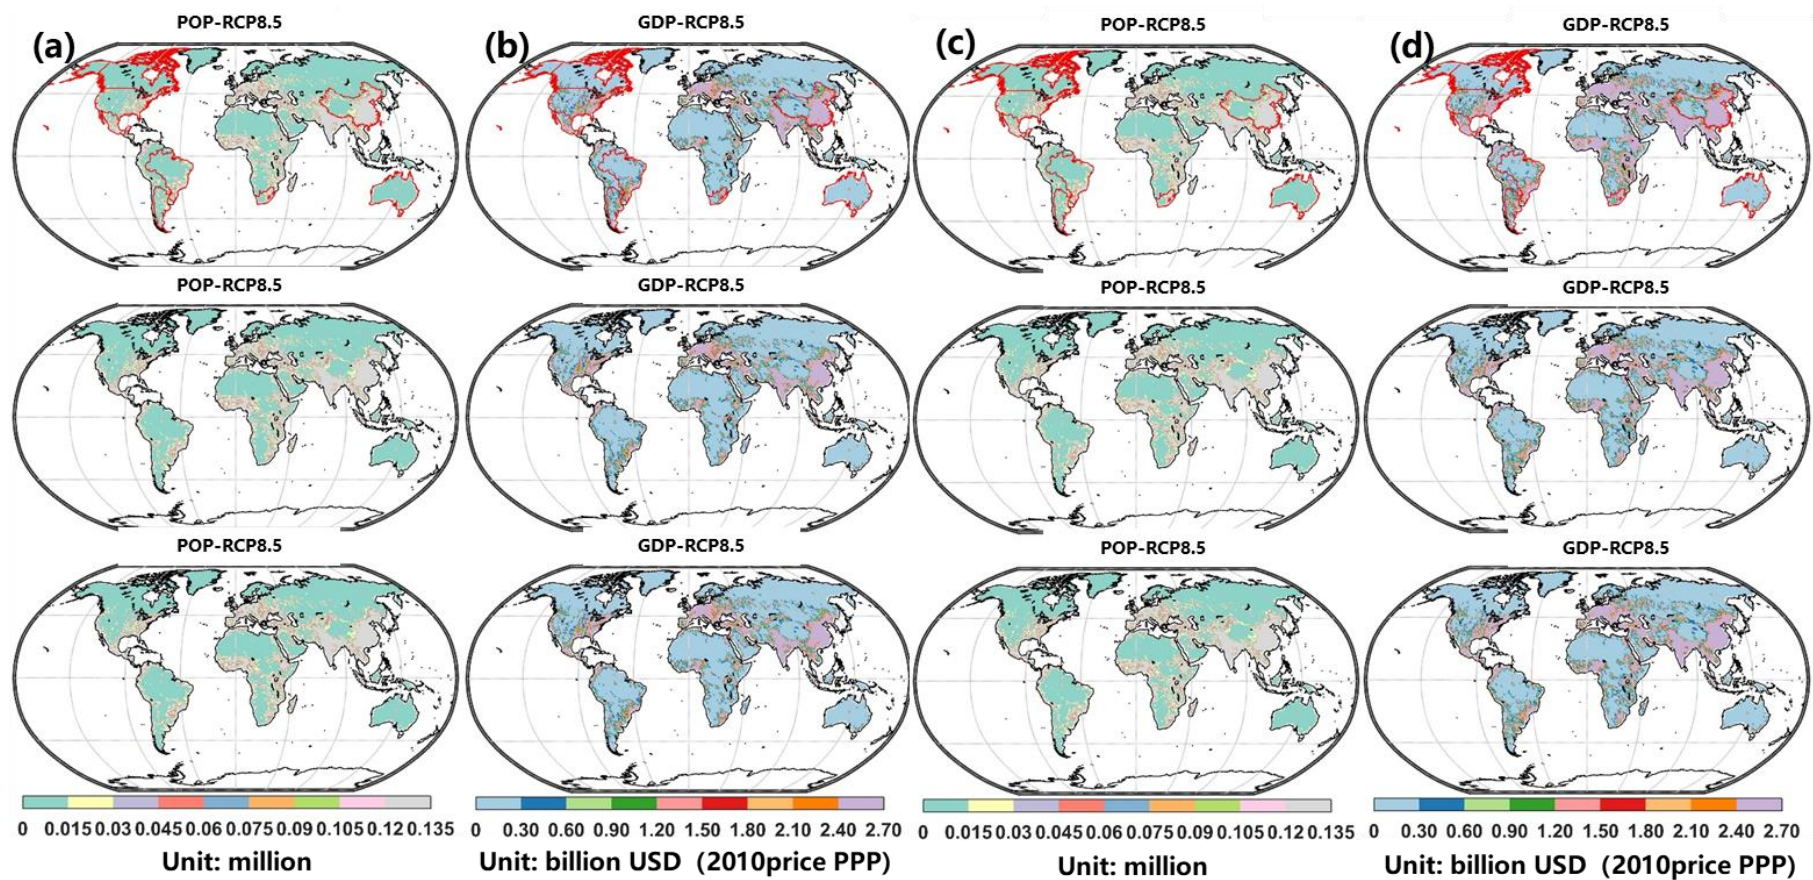

**Figure S1 GDP and Population under the 1.5°C and 2.0°C target**

Maps of the projected population (a,c) and GDP (b,d) scenarios for the 30-year 1.5°C warming period (a,b) and 2.0°C warming period (c,d) for the RCP2.6, RCP4.5, RCP8.5 scenarios. Red lines in the top panel mark the eight hotspot countries spanning over different socio-climatic regions in Section 3.5.

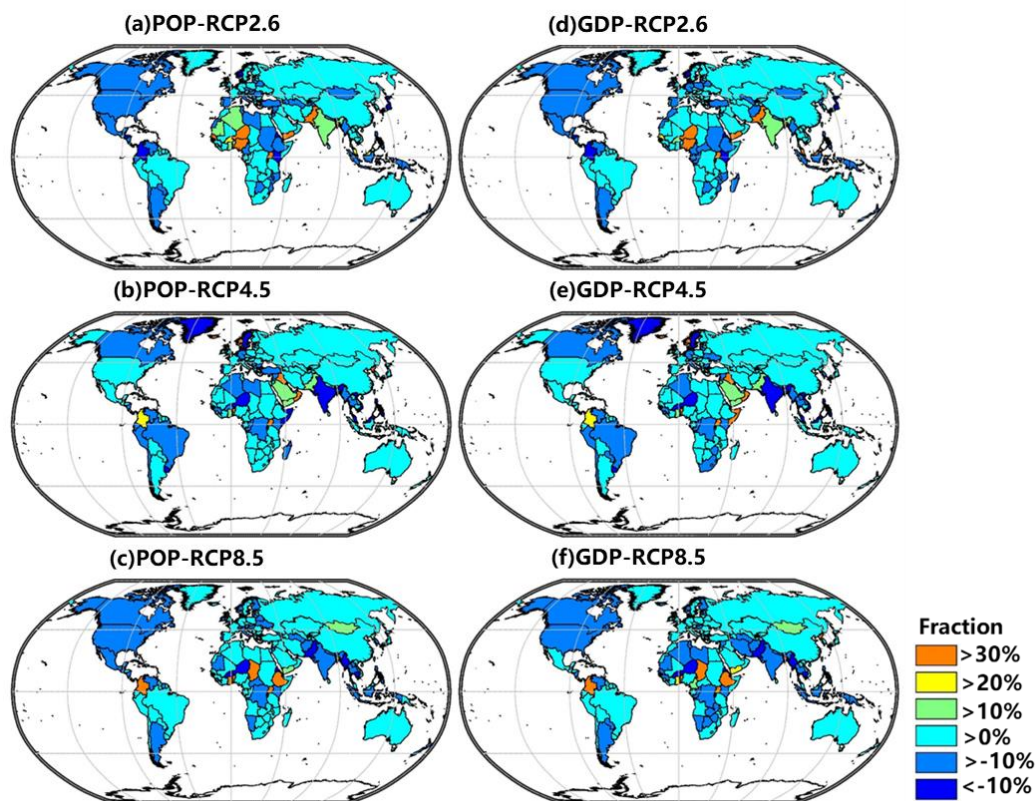

**Figure S2 National population and GDP fraction exposing to more frequent severe droughts in 2.0°C relative to 1.5°C warming target.**

Maps of relative population (a,c,e) and GDP (b,d,f) fractions that exposed to more frequent severe droughts at the national scale for RCP2.6, RCP4.5, RCP 8.5 scenarios. The color-bar in the right side represents six ranks of the population and GDP fractions.

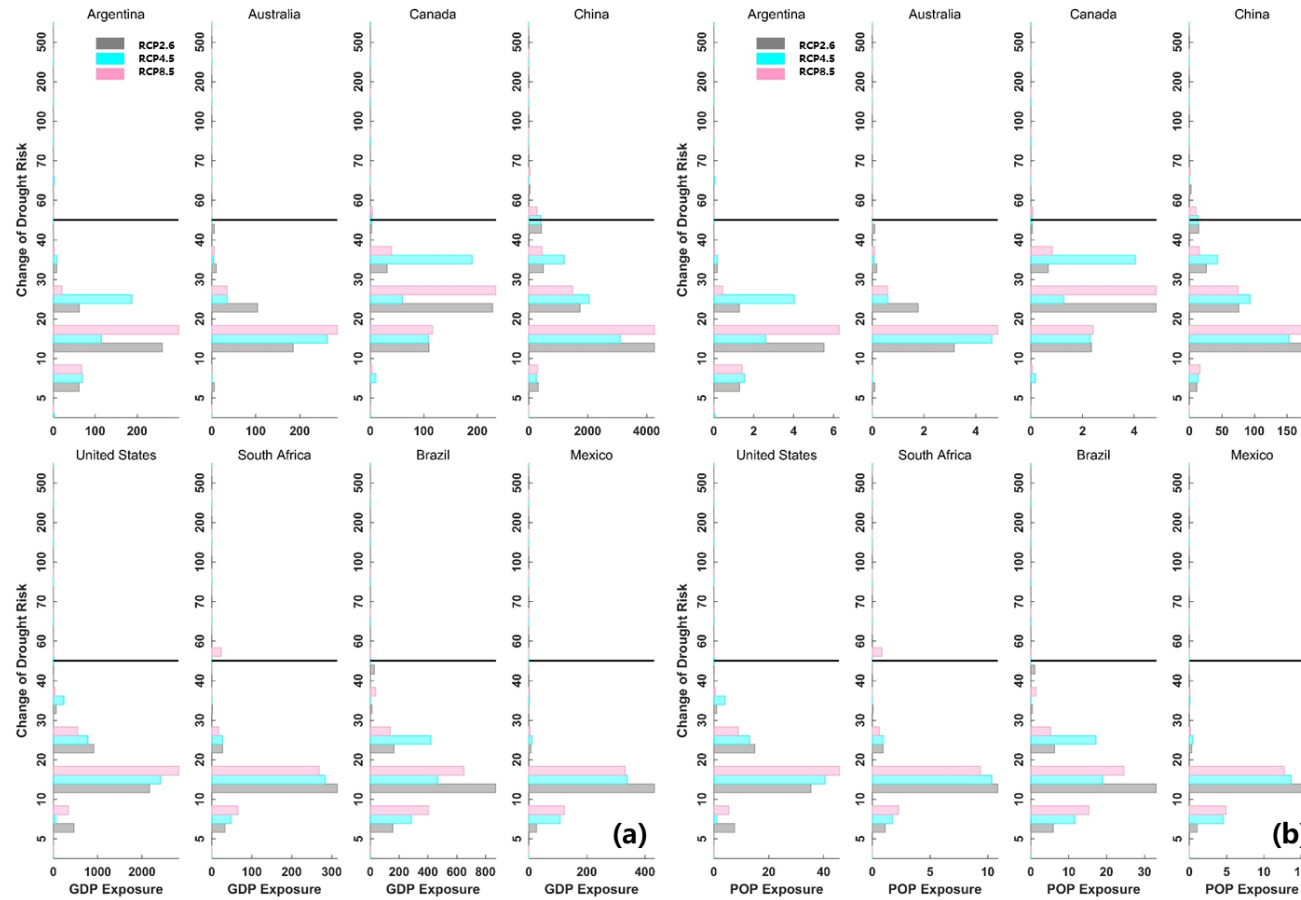

**Figure S3 Drought exposures for 8 typical drought-prone countries under the 1.5 °C warming target**

Projected GCMs median changes in joint 50-year return periods of droughts (duration and severity) as a function of GDP (a)/ POP (b) fraction for 8 typical countries suffering severe droughts from the historical period to the 1.5°C warming target under RCP2.6, RCP4.5, and RCP8.5.



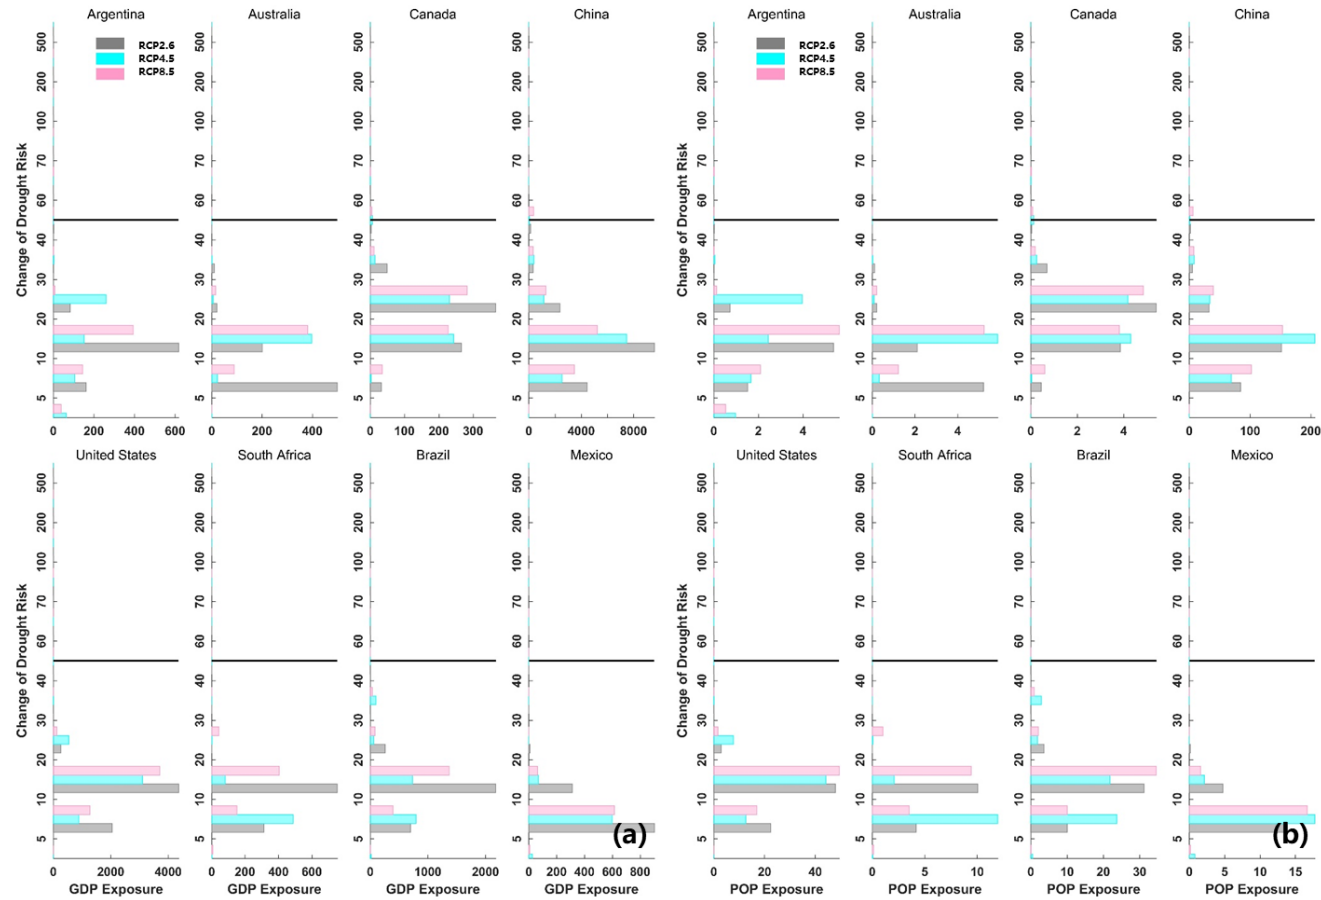

**Figure S4 Drought exposures for 8 typical drought-prone countries under the 2.0 °C warming target**

Projected GCMs median changes in joint 50-year return periods of droughts (duration and severity) as a function of GDP (a)/ POP (b) fraction for 8 typical countries suffering severe droughts from the historical period to the 2.0 °C warming target under RCP2.6, RCP4.5, and RCP8.5.

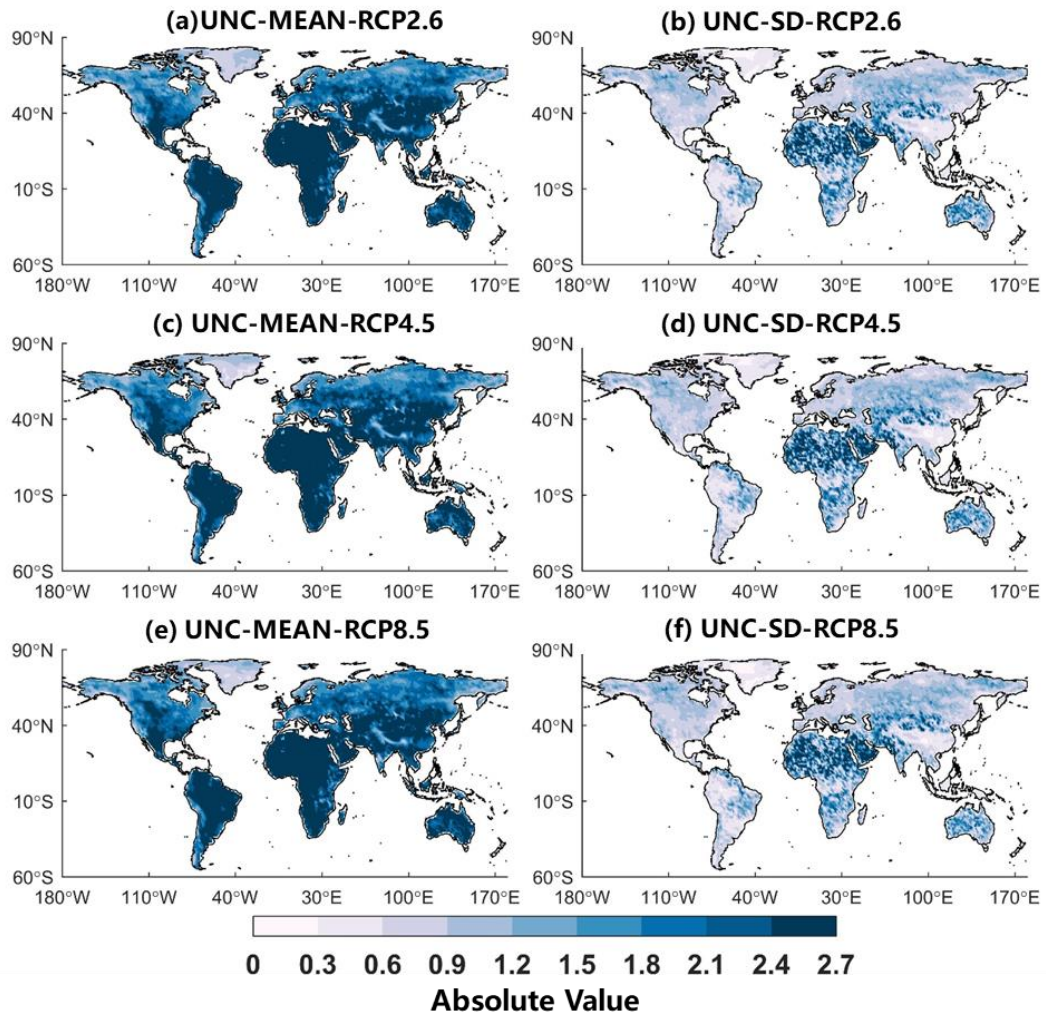

**Figure S5 Uncertainty for SPEI-3 changes under the 1.5°C warming target**

Maps of the projected uncertainty (measured by 5-95% confidence intervals) in SPEI-3 mean (MEAN) (a,c,e) and standard deviation (SD) (b,d,f) changes under the 1.5°C warming target relative to historical period (1976-2000) for RCP2.6, RCP4.5, RCP8.5 scenarios.

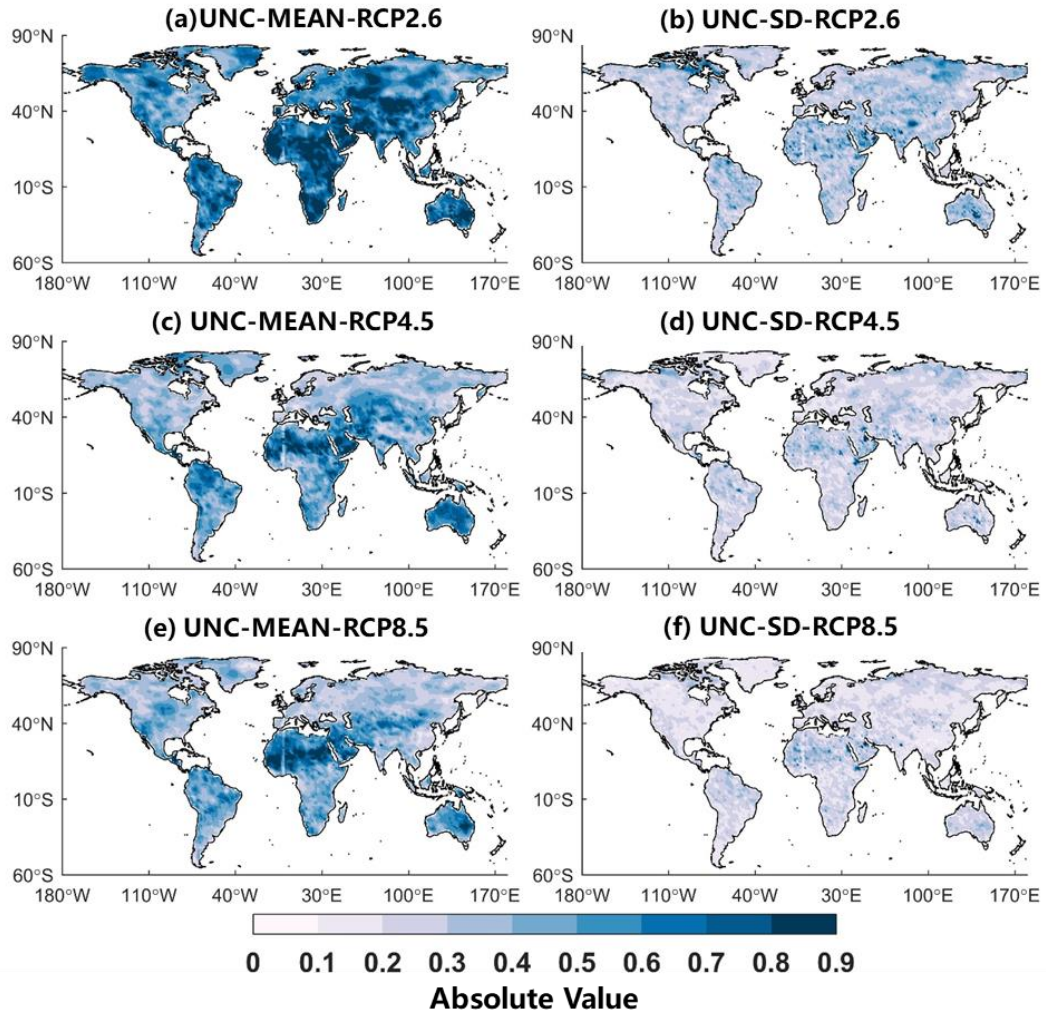

**Figure S6 Uncertainty for SPEI-3 changes between the 1.5°C and 2.0°C warming target**  
 Maps of the projected uncertainty (measured by 5-95% confidence intervals) in SPEI-3 mean (MEAN) (a,c,e) and standard deviation (SD) (b,d,f) changes under the 2.0°C warming target relative to 1.5°C warming target for RCP2.6, RCP4.5, RCP8.5 scenarios.



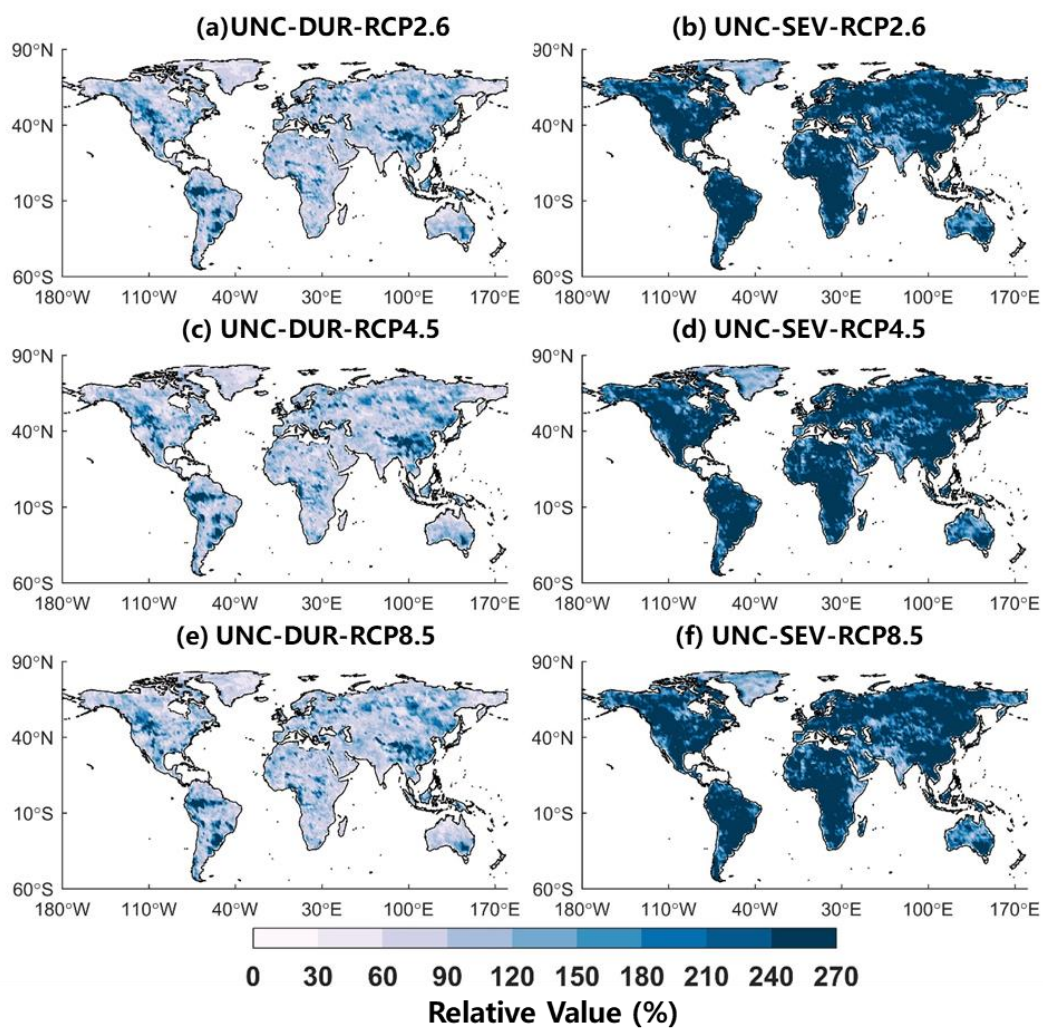

**Figure S7 Uncertainty for drought duration and severity changes under the 1.5°C warming target**

Maps of the projected uncertainty (measured by 5-95% confidence intervals) in drought duration (DUR) (a,c,e) and severity (SEV) (b,d,f) changes under the 1.5°C warming target relative to historical period (1976-2000) for RCP2.6, RCP4.5, RCP8.5 scenarios.

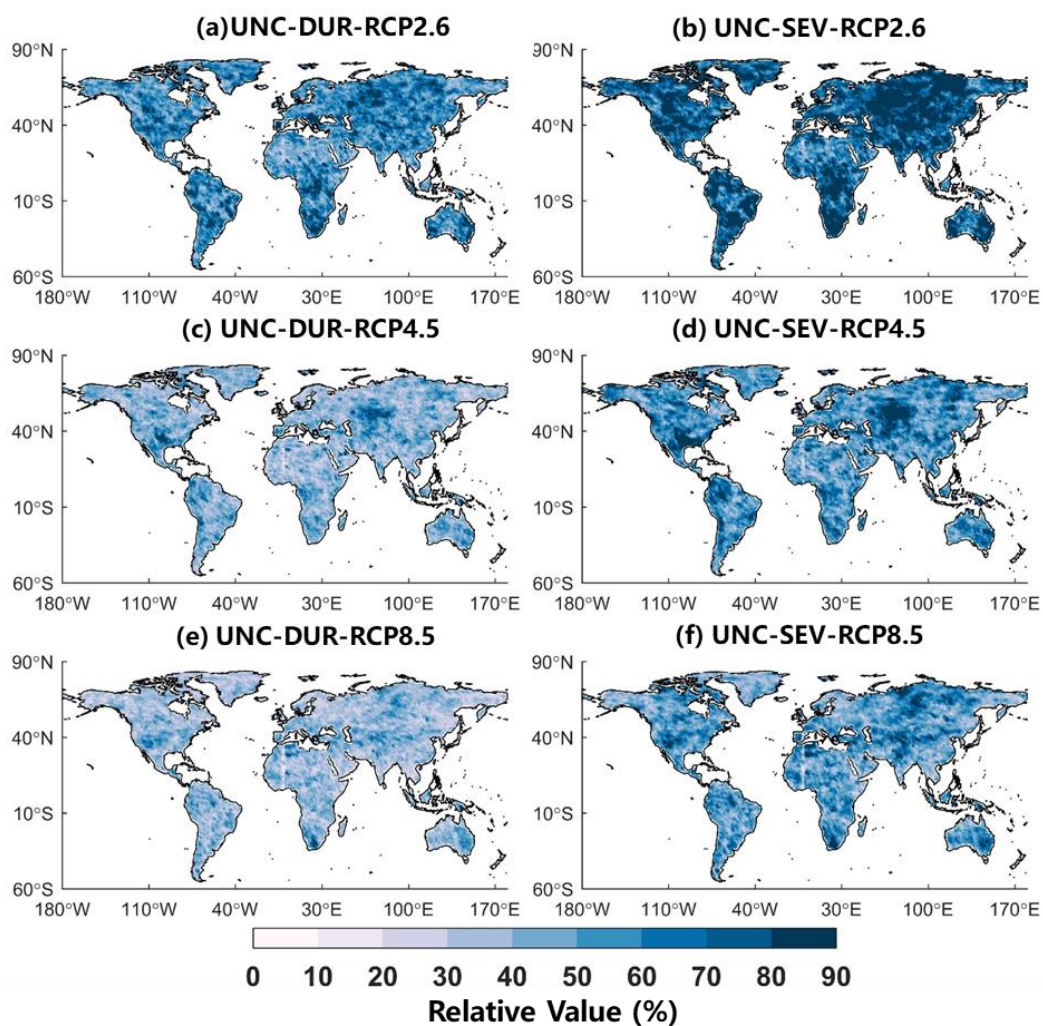

**Figure S8 Uncertainty for drought duration and severity changes between the 1.5°C and 2.0°C warming target**

Maps of the projected uncertainty (measured by 5-95% confidence intervals) in drought duration (DUR) (a,c,e) and severity (SEV) (b,d,f) changes under the 2.0°C warming target relative to 1.5°C warming target for RCP2.6, RCP4.5, RCP8.5 scenarios.

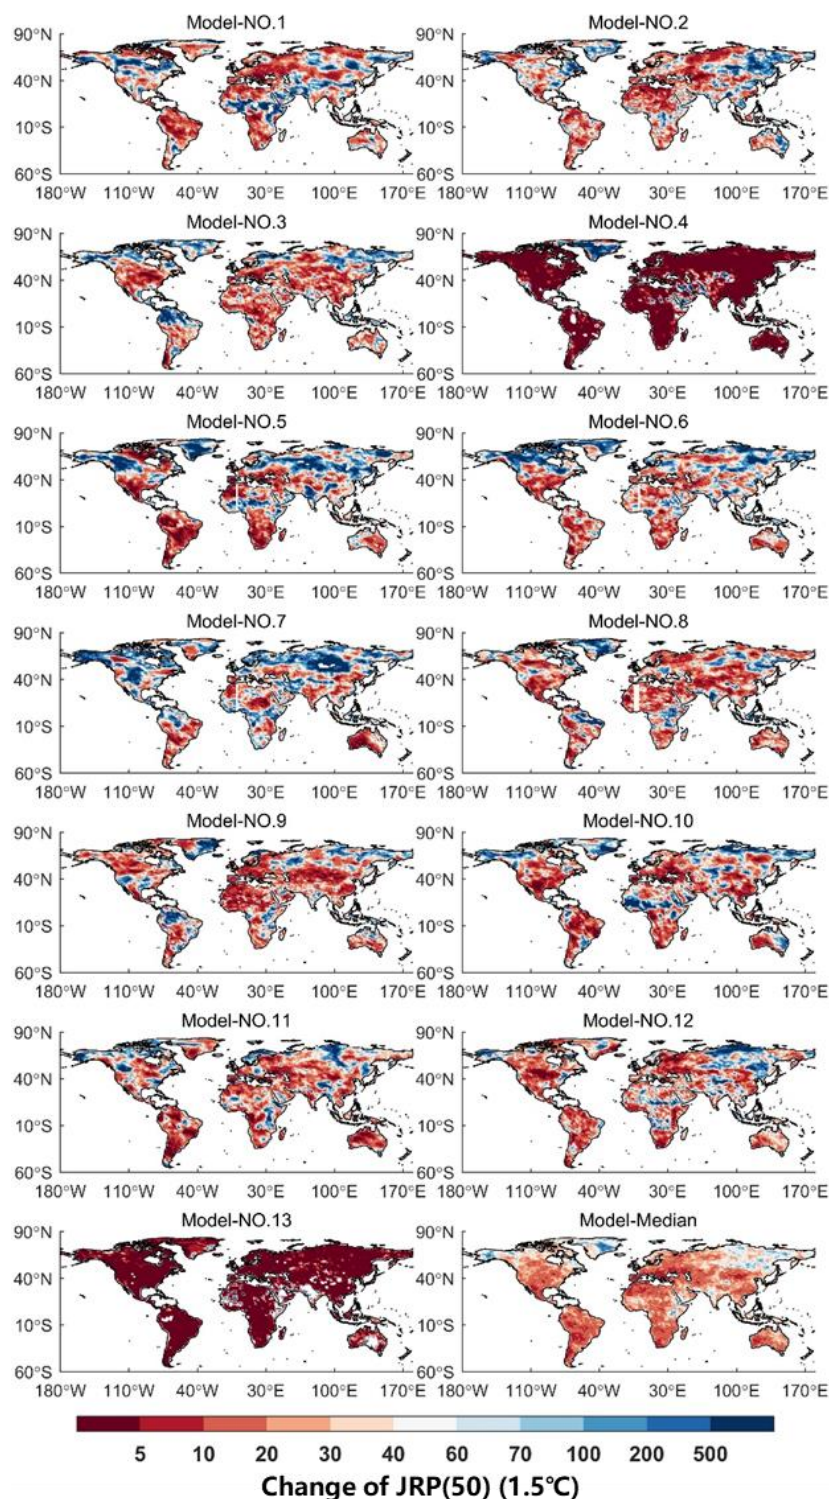

**Figure S9 Model uncertainty for changes of 50-year joint return period (JRP) under the 1.5°C warming target**

Maps of the single model (Model-NO.1-Model-NO.13) and multi-model ensemble median (Model-Median) changes of the historical (1976-2005) 50-year joint return period under the 1.5°C warming target for RCP4.5 scenario.



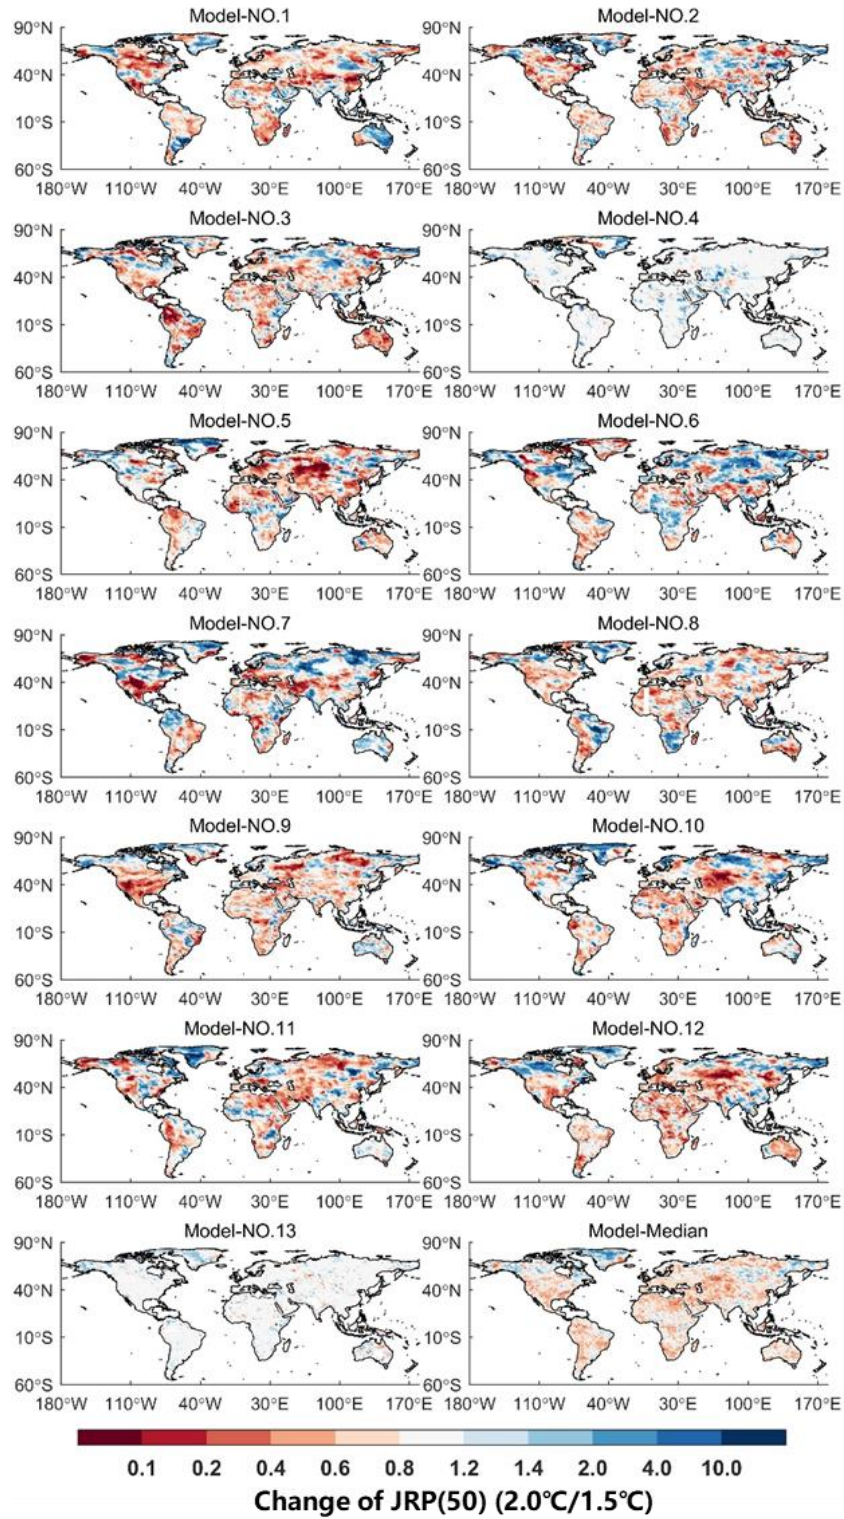

**Figure S10 Model uncertainty for changes of 50-year joint return period (JRP) between the 1.5°C and 2.0°C warming target**

Maps of the single model (Model-NO.1-Model-NO.13) and multi-model ensemble median (Model-Median) changes of the historical (1976-2005) 50-year joint return period under the 2.0°C warming target relative to 1.5°C warming target for RCP4.5 scenario.

**Table S1 Summary statistic table for changes in major variables**

| <b>Summary statistic</b>      |                                                                                                   |              |                                 |
|-------------------------------|---------------------------------------------------------------------------------------------------|--------------|---------------------------------|
| <b>Variable</b>               | <b>Explanation</b>                                                                                | <b>1.5°C</b> | <b>2-1.5(°C) <sup>(1)</sup></b> |
| <b>SPEI<sub>3</sub>(Mean)</b> | Percentage of continental areas for decreasing mean SPEI <sub>3</sub>                             | 85%          | 58%                             |
| <b>SPEI<sub>3</sub>(SD)</b>   | Percentage of continental areas for increasing standard deviation of SPEI <sub>3</sub>            | 100%         | 95%                             |
| <b>Drought duration</b>       | Percentage of continental areas for increasing mean drought duration                              | 78%          | 65%                             |
| <b>Drought severity</b>       | Percentage of continental areas for increasing mean drought severity                              | 99%          | 84%                             |
| <b>50-year JRP</b>            | Percentage of continental areas for increasing occurrence of 50-year drought events               | 88%          | 71%                             |
| <b>GDP exposure</b>           | The number of countries exhibit a 100% fraction in GDP exposed to increasing drought risks        | 73           | 17                              |
| <b>Population exposure</b>    | The number of countries exhibit a 100% fraction in population exposed to increasing drought risks | 75           | 17                              |

Notes:

(1) 2-1.5(°C) means differences in effects between the 1.5°C and 2.0°C warming levels.
